# Supplementary material for: Adsorption of Different Pollutants by Using Microplastic with Different Influencing Factors and Mechanisms in Wastewater: A Review
Source: MDPI journal article supplement (doi:10.3390/nano12132256), 2022-06-30
Supplement: s1 [file s1]

## **Supplementary Material**

**Figure S1.** The process of forming large plastics into microplastics [1].

**Figure S2.** Schematic representation of the six sorption mechanisms [2].

**Table S1.** Classification of microplastics.

**Table S2.** Surface area parameters of different adsorbents.

**Table S3.** Adsorption mechanism of plastic on organic pollutants.

**Table S4.** Adsorption mechanism of plastics on inorganic pollutants.

**Table S5.** Adsorption mechanism of plastics on other pollutants.

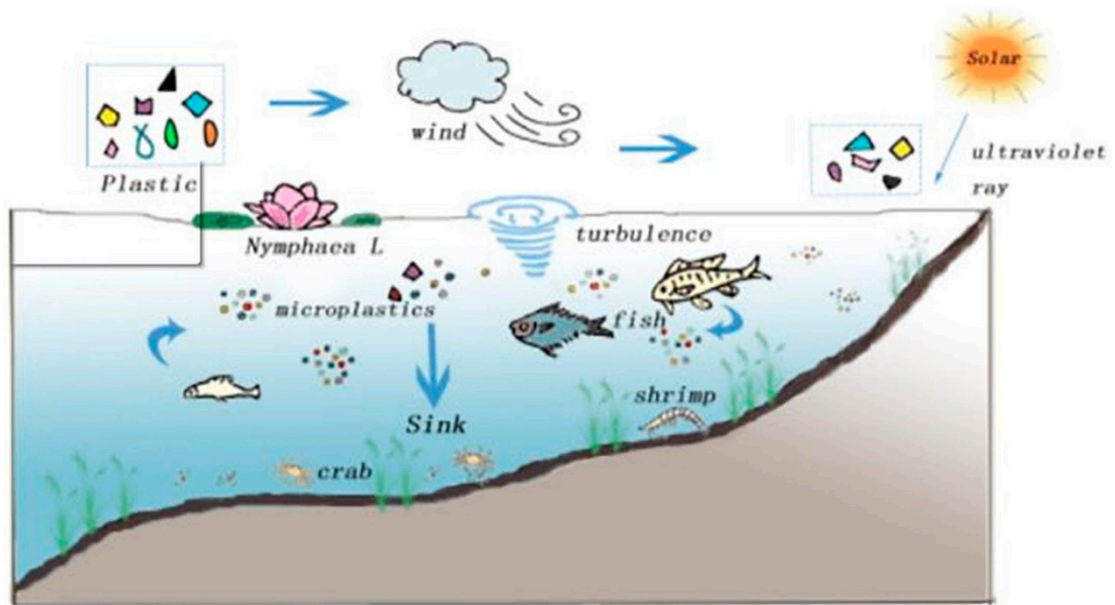

**Figure S1.** The process of forming large plastics into microplastics [1].

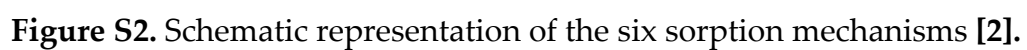

**Figure S2.** Schematic representation of the six sorption mechanisms [2].

**Table S1.** Classification of microplastics.

| Features          | Classification                                                                                                                                                                            | Reference |
|-------------------|-------------------------------------------------------------------------------------------------------------------------------------------------------------------------------------------|-----------|
| source            | primary plastic (primary plastic), secondary plastic                                                                                                                                      | [3]       |
| color             | white/translucent, black/brown, blue, red/pink,<br>green                                                                                                                                  | [3]       |
| Shape             | fibers, filaments, fragments, films, particles                                                                                                                                            | [4]       |
| polymer           | polyethylene, polyethylene terephthalate, polyester,<br>polypropylene plastic polymer                                                                                                     | [5]       |
| Source<br>(grade) | foam plastics (polycarbonate polyurethane (PCU)<br>fragments), boat paints (polypropylene PP,<br>polyethylene PE + film PP), fishing nets and lines,<br>and textile production (PET, PES) | [6]       |
| particle<br>size  | <0.5 mm, 0.5 mm - 1 mm, 1 mm - 2 mm,<br>2 mm - 3 mm, 3 mm - 4 mm, 4 mm - 5 mm                                                                                                             | [7]       |

**Table S2.** Surface area parameters of different adsorbents

| Adsorbent                                           | surface area/ m <sup>2</sup> /g                                                    | Reference |
|-----------------------------------------------------|------------------------------------------------------------------------------------|-----------|
| HDPE and LDPE                                       | $0.164 \pm 0.02$ and $0.043 \pm 0.001$                                             | [8]       |
| MN 200, Dowex XZ and AuRIX                          | 793, 39.2 and 37.5                                                                 | [9]       |
| FRP particles                                       | 2.7                                                                                | [10]      |
| CalP2, CalP3 and CalP4                              | 596, 630 and 759                                                                   | [11]      |
| PE rope of 1, 4 and 10-mm                           | 0.129, 0.042 and 0.027                                                             | [12]      |
| YWB-7                                               | 663.8                                                                              | [13]      |
| PVC                                                 | 0.595                                                                              | [14]      |
| PE, PP, PES and PA                                  | $0.2651 \pm 0.01$ , $0.3553 \pm 0.04$ ,<br>$0.1127 \pm 0.03$ and $0.1170 \pm 0.03$ | [15]      |
| Synthetic Resin                                     | 27.82                                                                              | [16]      |
| PAN                                                 | 27.80                                                                              | [17]      |
| PAN                                                 | 27.80                                                                              | [18]      |
| Resin                                               | 47.54, 39.15 and 191.57                                                            | [19]      |
| IRC748 and NDC702                                   | 36.3985 and 14.2367                                                                | [20]      |
| D152 resin                                          | 4.8                                                                                | [21]      |
| Cl-PAni and Ph-PAni NFs                             | 37.6 and 44.1                                                                      | [22]      |
| Electrospun fibrous                                 | 10-40                                                                              | [23]      |
| PE, PET, PP, PS and PVC                             | 1.4, 0.35, 2.7, 3.2 and 0.59                                                       | [24]      |
| grafted polyethylene imine<br>melamine formaldehyde | 460                                                                                | [25]      |
| Chloromethylated polystyrene<br>and GQ-08 resin     | 24.76 and 31.45                                                                    | [26]      |

**Table S3.** Adsorption mechanism of organic pollutants.

| Adsorbent                                         | Pollutants                                       | The adsorption mechanism                                                                         | Reference |
|---------------------------------------------------|--------------------------------------------------|--------------------------------------------------------------------------------------------------|-----------|
| polyethylene microplastic                         | aromatic amine                                   | the salting out effect                                                                           | [8]       |
| polymer resin                                     | phenol                                           | the mechanism of adsorption and ion exchange                                                     | [9]       |
| glass fiber reinforced plastic                    | polyacrylic acid                                 | electrostatic interaction                                                                        | [10]      |
| porous polycarboxarene                            | organic micropollutants                          | hydrophobic interactions                                                                         | [11]      |
| microplastic                                      | phenanthrene                                     | absorption mechanism, the hydrophobicity of organic carbon                                       | [12]      |
| acrylate polymer YWB - 7 resin                    | 5 - 2 sulfo sodium isophthalic acid              | hydrogen bonding and hydrophobic interaction                                                     | [13]      |
| micro polyvinyl chloride (PVC) plastic            | Fe and single hydroxyl derivatives               | hydrophobic interactions                                                                         | [14]      |
| biological membrane reinforced plastic microfiber | perfluorinated octane sulfonic acid (PFOS)       | hydrophobic interactions                                                                         | [15]      |
| Micro polystyrene plastics                        | three three azole fungicide                      | hydrophobic and electrostatic interactions                                                       | [27]      |
| plastic cellulose acetate                         | 2, 4 - diallyl (sorbic acid)                     | group acetylated                                                                                 | [28]      |
| microplastic                                      | PFOS, FOSA                                       | hydrophobic interactions                                                                         | [29]      |
| polylipoic acid ester-base coagulant              | organic pollutants (pops)                        | hydrophobic interactions                                                                         | [30]      |
| micro polystyrene plastics                        | soluble organic matter (DOM)                     | hydrophobic interactions, $\pi$ - $\pi$ electron donor receptor interactions, salting-out effect | [31]      |
| micro polystyrene plastics                        | triclosan                                        | hydrophobic interactions                                                                         | [32]      |
| polyethylene and polyvinyl                        | sanzheng butyl ester phosphate and phosphate (2- | weak van der Waals force, adsorption selectivity                                                 | [33]      |

|                                                               |                                                  |                                                                                      |      |
|---------------------------------------------------------------|--------------------------------------------------|--------------------------------------------------------------------------------------|------|
| chloride (PVC)<br>plastic                                     | ethyl chloride)                                  |                                                                                      |      |
| in plastic and<br>plastic                                     | the philippines, nitrobenzene<br>and naphthalene | hydrophobic interaction, $\pi$ - $\pi$ ,<br>crystallinity                            | [34] |
| anion exchange<br>resin                                       | phenol                                           | ion exchange                                                                         | [35] |
| microplastic PS<br>+ PE                                       | three types of cones sterol<br>fungicide         | hydrophobic interaction, van der<br>Waals force                                      | [36] |
| the original<br>rusty water<br>microplastic<br>functionalized | ions, organic pollutants                         | electrostatic force, van der Waals<br>force, space steric hindrance                  | [37] |
| polystyrene<br>nano ball                                      | 2,4,6-trinitrotoluene (TNT)                      | p - phosphorus accumulation<br>interaction, hydrogen, and<br>hydrophobic interaction | [38] |
| polystyrene<br>plastic                                        | organic pollutants (pops)                        | the adsorption affinity                                                              | [39] |
| adsorbent                                                     | chlorinated methane                              | the adsorption selectivity                                                           | [40] |
| polystyrene<br>microspheres                                   | naphthalene (NAP) and its<br>derivatives         | hydrophobic                                                                          | [41] |
| microplastic                                                  | 17 beta estradiol                                | hydrophobic                                                                          | [42] |
| microplastic                                                  | nonpolar organic compounds                       | hydrophobic interactions                                                             | [43] |
| microplastic                                                  | fuel aromatics and ether                         | hydrophobic                                                                          | [44] |
| microplastic                                                  | phenanthrene                                     | hydrophobic                                                                          | [12] |
| polystyrene                                                   | nonionic organic compounds                       | $\pi$ - $\pi$ - aromatic interactions,<br>hydrophobic interactions                   | [45] |

---

**Table S4.** Adsorption mechanism of inorganic pollutants.

| Adsorbent                                                 | Pollutants                                                   | The adsorption mechanism                                           | Reference |
|-----------------------------------------------------------|--------------------------------------------------------------|--------------------------------------------------------------------|-----------|
| polyacrylonitrile - 2 - amino thiazole resin              | Hg, Cd, Pb, Cu, Zn and Ni                                    | the adsorption affinity                                            | [16]      |
| polyacrylonitrile - 2 - amino - 2 - thiazole moiety resin | precious metal ions                                          | the adsorption affinity                                            | [17]      |
| polyacrylonitrile - amino thiourea resin                  | Rh(III), Ru(IV), Pd(II), Ir(IV)                              | the adsorption affinity                                            | [18]      |
| methyl glycidyl ester of acrylic resin                    | Cu(II), Pb(II)                                               | the adsorption affinity                                            | [19]      |
| IDA - chelating resin                                     | Cu(II), Pb(II), Cd(II)                                       | the adsorption affinity                                            | [20]      |
| D152 resin                                                | Cd(II)                                                       | surface adsorption, surface electrical property, and hydrogen bond | [21]      |
| phytic acid doped polyaniline nanofibers                  | water-borne Cu (II)                                          | the adsorption affinity                                            | [22]      |
| electrospinning fiber membrane                            | heavy metal                                                  | the adsorption affinity                                            | [23]      |
| microplastic                                              | Cd, Co, Cr, Cu, Ni, Pb, and Zn                               | chemical adsorption                                                | [24]      |
| iminodiacetic acid chelating resin                        | Sc(III), Y(III), La(III), Fe(III), Al(III), Ga(III), In(III) | the adsorption selectivity                                         | [30]      |
| micro/nano plastic                                        | metal                                                        | the adsorption affinity                                            | [32]      |
| folic acid - polyaniline hybrid hydrogel                  | Cr (VI), Hg (II), Pb (II)                                    | REDOX                                                              | [46]      |
| folic acid - polyaniline hybrid hydrogel                  | anionic dye                                                  | the adsorption affinity                                            | [46]      |
| modification of polyethyleneimine                         | Cr(III), Fe(III)                                             | chemical adsorption                                                | [47]      |
| polyethylimine                                            | Pb and Hg                                                    | the adsorption affinity                                            | [48]      |



|                                                                                               |                                                                      |                                                                                |      |
|-----------------------------------------------------------------------------------------------|----------------------------------------------------------------------|--------------------------------------------------------------------------------|------|
| polystyrene nanofibers                                                                        | Cd, Ni                                                               | normal adsorption                                                              | [49] |
| acrylic acid grafted<br>polytetrafluoroethylene<br>fibers                                     | Er(III)                                                              | ion exchange resin and metal or<br>complex                                     | [50] |
| new IDA - chelating resin                                                                     | Cu(II), Pb(II), Cd(II)                                               | ion exchange, chemical<br>interaction                                          | [51] |
| IRN77 cation exchange resin                                                                   | Co(II), Cr(III), Ni(II)                                              | the adsorption affinity                                                        | [52] |
| amines and sulfur chelating<br>resin                                                          | Zn (II), Cd (II),<br>Hg (II)                                         | the nature of the chelating<br>groups, the stability of the<br>metal-ligand CO | [53] |
| coal and polyvinyl chloride<br>(PVC) scrap                                                    | Hg                                                                   | carbon chlorine key (modified)                                                 | [54] |
| cationic polystyrene balls                                                                    | paper anion<br>pollutants<br>in water                                | grafting                                                                       | [55] |
| crosslinked polystyrene<br>diethanolamine load DiDai<br>type of dendritic polymers<br>grafted | metal ions                                                           | hydrogen bonding, adsorption<br>affinity                                       | [56] |
| polytetrafluoroethylene<br>fibers                                                             | Cu(II)                                                               | the hydroxyl and carbonyl                                                      | [57] |
| porous cellulose modified<br>polyethylene imine carrier                                       | Hg                                                                   | the adsorption affinity                                                        | [58] |
| IRN - 77 cation exchange<br>resin                                                             | Co(II), Ni(II), Cr(III)                                              | the adsorption affinity                                                        | [59] |
| 3 - aminopyridine<br>hydrophilic spacer chelating<br>resin                                    | Hg(II), Ag(I), Fe(III),<br>Pb(II), Co(II), Cu(II),<br>Ni(II), Cd(II) | the adsorption selectivity                                                     | [60] |
| polystyrene (MPS)                                                                             | nanometer oxide<br>(CeNPs)                                           | the adsorption affinity                                                        | [61] |
| polyacrylic acid - PVC<br>composite adsorbent                                                 | cadmium pollution<br>of wastewater                                   | ion exchange                                                                   | [62] |
| micro polystyrene plastics                                                                    | heavy metal                                                          | physical and chemical<br>adsorption                                            | [63] |
| microplastic                                                                                  | metal pollutants                                                     | the adsorption                                                                 | [64] |
| doped polyaniline                                                                             | anionic dye                                                          | chemical interaction                                                           | [65] |
| "X" shape of the cavity 2 d<br>coordination polymer                                           | oxygen anion<br>pollutants                                           | the adsorption affinity                                                        | [66] |
| new type of sulfur-<br>containing polyamine<br>chelating resin                                | precious metal                                                       | the adsorption affinity                                                        | [67] |

|                                      |         |                         |      |
|--------------------------------------|---------|-------------------------|------|
| amination polyacrylonitrile<br>fiber | Pb, Cu  | the adsorption affinity | [68] |
| micro polystyrene plastics           | As(III) | hydrogen bonding        | [69] |

**Table S5.** Adsorption mechanism of other pollutants.

| Adsorbent                                                               | Pollutants                                                | The adsorption mechanism                                                                                 | Reference |
|-------------------------------------------------------------------------|-----------------------------------------------------------|----------------------------------------------------------------------------------------------------------|-----------|
| grafted polyethylene imine<br>melamine formaldehyde<br>2-amino modified | CO <sub>2</sub>                                           | chemical adsorption and<br>physical adsorption                                                           | [25]      |
| polystyrene pyridine resin,<br>D301 resin, and 330 resin                | glyphosate                                                | hydrogen bonding, single<br>anion exchange                                                               | [26]      |
| porous super hydrophobic<br>foam plastic                                | oily wastewater                                           | Superhydrophobic and<br>superhydrophilic                                                                 | [70]      |
| carbonized polypropylene                                                | oil                                                       | mechanism of carbide                                                                                     | [71]      |
| weak base anion<br>exchange resin                                       | benzene sulfonate                                         | ion exchange                                                                                             | [72]      |
| polystyrene matrix                                                      | protein fiber connection                                  | hydrophobic interactions                                                                                 | [73]      |
| polystyrene                                                             | thrombin                                                  | the adsorption affinity                                                                                  | [74]      |
| La(OH) <sub>3</sub> @SA/PAM                                             | methylene blue, crystal<br>violet, and malachite<br>green | hydrogen bonding,<br>electrostatic interaction                                                           | [75]      |
| metal ions impregnated<br>polystyrene resin                             | antibiotics in water<br>pollutants                        | the surface complexation,<br>cationic bridge interaction,<br>and electrostatic<br>attraction/competition | [76]      |

|                                                                   |                                                  |                                                                                                                            |      |
|-------------------------------------------------------------------|--------------------------------------------------|----------------------------------------------------------------------------------------------------------------------------|------|
| polyvinyl chloride (PVC)/polystyrene fiber electrostatic spinning | oil pollution                                    | adsorption and capillary action                                                                                            | [77] |
| polyvinyl chloride (PVC) mesoporous membrane                      | methylene blue                                   | high water flux                                                                                                            | [78] |
| micro polystyrene plastics                                        | ator-<br>vastatin (ATV) and<br>amlodipine (AML)  | hydrophobic interaction, $\pi$ - $\pi$                                                                                     | [79] |
| PTFE membrane                                                     | crude oil                                        | physical adsorption                                                                                                        | [80] |
| polymer nanocomposites                                            | harmful pollutants in the<br>water or wastewater | the adsorption affinity                                                                                                    | [81] |
| low poly beta cyclodextrin<br>coupling polystyrene                | puerarin                                         | hydrogen bonding,<br>hydrophobic effect, van der<br>Waals force, electrostatic and<br>$\pi$ - $\pi$ synergy of interaction | [82] |

## References

1. Tang, Y.; Liu, Y.; Chen, Y.; Zhang, W.; Zhao, J.; He, S.; Yang, C.; Zhang, T.; Tang, C.; Zhang, C., A review: Research progress on microplastic pollutants in aquatic environments. *Sci. Total Environ.* **2021**, 766, 142572 <https://doi.org/10.1016/j.scitotenv.2020.142572>
2. Torres, F. G.; Dioses-Salinas, D. C.; Pizarro-Ortega, C. I.; De-la-Torre, G. E., Sorption of chemical contaminants on degradable and non-degradable microplastics: Recent progress and research trends. *Sci. Total Environ.* **2021**, 757, 143875 <https://doi.org/10.1016/j.scitotenv.2020.143875>
3. Migwi, F. K.; Ogunah, J. A.; Kiratu, J. M., Occurrence and spatial distribution of microplastics in the surface waters of Lake Naivasha, Kenya. *Environ. Toxicol. Chem.* **2020**, 39, 765-774 <https://doi.org/10.1002/etc.4677>
4. Yang, Z.; Li, S.; Ma, S.; Liu, P.; Peng, D.; Ouyang, Z.; Guo, X., Characteristics and removal efficiency of microplastics in sewage treatment plant of Xi'an City, northwest China. *Sci. Total Environ.* **2021**, 771, 145377 <https://doi.org/10.1016/j.scitotenv.2021.145377>
5. Qin, Y.; Wang, Z.; Li, W.; Chang, X.; Yang, J.; Yang, F., Microplastics in the sediment of lake Ulansuhai of Yellow river basin, China. *Water Environ. Res.* **2020**, 92, 829-839 <https://doi.org/10.1002/wer.1275>
6. Frias, J.; Sobral, P.; Ferreira, A. M., Organic pollutants in microplastics from two beaches of the Portuguese coast. *Mar. Pollut. Bull.* **2010**, 60, 1988-1992 <https://doi.org/10.1016/j.marpolbul.2010.07.030>
7. Cole, M.; Lindeque, P.; Halsband, C.; Galloway, T. S., Microplastics as contaminants in the marine environment: a review. *Mar. Pollut. Bull.* **2011**, 62, 2588-2597 <https://doi.org/10.1016/j.marpolbul.2011.09.025>
8. Vockenber, T.; Wichard, T.; Ueberschaar, N.; Franke, M.; Stelter, M.; Braeutigam, P., The sorption behaviour of amine micropollutants on polyethylene microplastics—impact of aging and interactions with green seaweed. *Environ. Sci-Proc Imp* **2020**, 22, 1678-1687 <https://doi.org/10.1039/D0EM00119H>
9. Caetano, M.; Valderrama, C.; Farran, A.; Cortina, J. L., Phenol removal from aqueous solution by adsorption and ion exchange mechanisms onto polymeric resins. *J. Colloid Interface Sci.* **2009**, 338, 402-409 <https://doi.org/10.1016/j.jcis.2009.06.062>

10. Terabayashi, T.; Maruyama, T.; Shimizu, Y.; Komatsu, M.; Takahashi, T., Surface modification with acrylic polyampholytes 1, adsorption of acrylic polyampholytes on fiberglass reinforced plastics, and characterization of the polymer adsorbed surfaces. *J. Appl. Polym. Sci.* **2006**, *101*, 4454-4461 <https://doi.org/10.1002/app.24084>
11. Shetty, D.; Jahovic, I.; Raya, J.; Asfari, Z.; Olsen, J.-C.; Trabolsi, A., Porous polycalix [4] arenes for fast and efficient removal of organic micropollutants from water. *ACS Appl. Mater. Interfaces* **2018**, *10*, 2976-2981 <https://doi.org/10.1021/acsami.7b16546>
12. Wang, Z.; Chen, M.; Zhang, L.; Wang, K.; Yu, X.; Zheng, Z.; Zheng, R., Sorption behaviors of phenanthrene on the microplastics identified in a mariculture farm in Xiangshan Bay, southeastern China. *Sci. Total Environ.* **2018**, *628*, 1617-1626 <https://doi.org/10.1016/j.scitotenv.2018.02.146>
13. Yang, W.; Li, A.; Zhang, Q.; Fei, Z.; Liu, F., Adsorption of 5-sodiosulfoisophthalic acids from aqueous solutions onto acrylic ester polymer YWB-7 resin. *Sep. Purif. Technol.* **2005**, *46*, 161-167 <https://doi.org/10.1016/j.seppur.2005.05.005>
14. Bao, Z.-Z.; Chen, Z.-F.; Zhong, Y.; Wang, G.; Qi, Z.; Cai, Z., Adsorption of phenanthrene and its monohydroxy derivatives on polyvinyl chloride microplastics in aqueous solution: Model fitting and mechanism analysis. *Sci. Total Environ.* **2021**, *764*, 142889 <https://doi.org/10.1016/j.scitotenv.2020.142889>
15. Bhagwat, G.; Tran, T. K. A.; Lamb, D.; Senathirajah, K.; Grainge, I.; O'Connor, W.; Juhasz, A.; Palanisami, T., Biofilms enhance the adsorption of toxic contaminants on plastic microfibers under environmentally relevant conditions. *Environ. Sci. Technol.* **2021**, *55*, 8877-8887 <https://doi.org/10.1021/acs.est.1c02012>
16. Xiong, C.; Jia, Q.; Chen, X.; Wang, G.; Yao, C., Optimization of polyacrylonitrile-2-aminothiazole resin synthesis, characterization, and its adsorption performance and mechanism for removal of Hg(II) from aqueous solutions. *Ind. Eng. Chem. Res.* **2013**, *52*, 4978-4986 <https://doi.org/10.1021/ie3033312>
17. Chen, Y.; Zhao, Y., Synthesis and characterization of polyacrylonitrile-2-amino-2-thiazoline resin and its sorption behaviors for noble metal ions. *React. Funct. Polym.* **2003**, *55*, 89-98 [https://doi.org/10.1016/S1381-5148\(02\)00218-3](https://doi.org/10.1016/S1381-5148(02)00218-3)
18. Chen, Y.-Y.; Liang, C.; Chao, Y., Synthesis and characterization of polyacrylonitrile-thiosemicarbazide resin and its sorption behavior for Rh(III) Ru(IV) Pd(II) and Ir(IV) ions. *React. Funct. Polym.* **1998**, *36*, 51-58 [https://doi.org/10.1016/S1381-5148\(97\)00111-9](https://doi.org/10.1016/S1381-5148(97)00111-9)
19. Atia, A. A.; Donia, A. M.; Abou-El-Enein, S. A.; Yousif, A. M., Studies on uptake behaviour of copper(II) and lead(II) by amine chelating resins with different textural properties. *Sep. Purif. Technol.* **2003**, *33*, 295-301 [https://doi.org/10.1016/S1383-5866\(03\)00089-3](https://doi.org/10.1016/S1383-5866(03)00089-3)
20. Ling, P.; Liu, F.; Li, L.; Jing, X.; Yin, B.; Chen, K.; Li, A., Adsorption of divalent heavy metal ions onto IDA-chelating resins: simulation of physicochemical structures and elucidation of interaction mechanisms. *Talanta* **2010**, *81*, 424-432 <https://doi.org/10.1016/j.talanta.2009.12.019>
21. Xiong, C.; Yao, C., Study on the adsorption of cadmium(II) from aqueous solution by D152 resin. *J. Hazard. Mater.* **2009**, *166*, 815-820 <https://doi.org/10.1016/j.jhazmat.2008.11.082>
22. Kim, H. J.; Im, S.; Kim, J. C.; Hong, W. G.; Shin, K.; Jeong, H. Y.; Hong, Y. J., Phytic acid doped polyaniline nanofibers for enhanced aqueous copper(II) adsorption capability. *ACS Sustain. Chem. Eng.* **2017**, *5*, 6654-6664 <https://doi.org/10.1021/acssuschemeng.7b00898>
23. Huang, Y.; Miao, Y. E.; Liu, T., Electrospun fibrous membranes for efficient heavy metal removal. *J. Appl. Polym. Sci.* **2014**, *131*, <https://doi.org/10.1002/app.40864>
24. Godoy, V.; Blázquez, G.; Calero, M.; Quesada, L.; Martín-Lara, M., The potential of microplastics as carriers of metals. *Environ. Pollut.* **2019**, *255*, 113363 <https://doi.org/10.1016/j.envpol.2019.113363>
25. Yin, F.; Peng, P.; Mo, W.; Chen, S.; Xu, T., The preparation of a porous melamine-formaldehyde adsorbent grafted with polyethyleneimine and its CO<sub>2</sub> adsorption behavior. *New J. Chem.* **2017**, *41*, 5297-5304 <https://doi.org/10.1039/C7NJ00240H>
26. Xiao, G.; Wen, R., Comparative adsorption of glyphosate from aqueous solution by 2-aminopyridine modified polystyrene resin, D301 resin and 330 resin: influencing factors, salinity resistance and mechanism. *Fluid Phase Equilibria* **2016**, *411*, 1-6 <https://doi.org/10.1016/j.fluid.2015.11.026>
27. Fang, S.; Yu, W.; Li, C.; Liu, Y.; Qiu, J.; Kong, F., Adsorption behavior of three triazole fungicides on polystyrene microplastics. *Sci. Total Environ.* **2019**, *691*, 1119-1126 <https://doi.org/10.1016/j.scitotenv.2019.07.176>
28. Saski, W., Adsorption of sorbic acid by plastic cellulose acetates. *J. Pharm. Sci.* **1963**, *52*, 264-268 <https://doi.org/10.1002/jps.2600520316>
29. Wang, F.; Shih, K. M.; Li, X. Y., The partition behavior of perfluorooctanesulfonate (PFOS) and perfluorooctanesulfonamide (FOSA) on microplastics. *Chemosphere* **2015**, *119*, 841-847 <https://doi.org/10.1016/j.chemosphere.2014.08.047>

30. Yuchi, A.; Sato, T.; Morimoto, Y.; Mizuno, H.; Wada, H., Adsorption mechanism of trivalent metal ions on chelating resins containing iminodiacetic acid groups with reference to selectivity. *Anal. Chem.* **1997**, *69*, 2941-2944 <https://doi.org/10.1021/ac9612685>
31. Abdurahman, A.; Cui, K.; Wu, J.; Li, S.; Gao, R.; Dai, J.; Liang, W.; Zeng, F., Adsorption of dissolved organic matter (DOM) on polystyrene microplastics in aquatic environments: kinetic, isotherm and site energy distribution analysis. *Ecotoxicol. Environ. Saf.* **2020**, *198*, 110658 <https://doi.org/10.1016/j.ecoenv.2020.110658>
32. Yu, F.; Yang, C.; Zhu, Z.; Bai, X.; Ma, J., Adsorption behavior of organic pollutants and metals on micro/nanoplastics in the aquatic environment. *Sci. Total Environ.* **2019**, *694*, 133643 <https://doi.org/10.1016/j.scitotenv.2019.133643>
33. Chen, S.; Tan, Z.; Qi, Y.; Ouyang, C., Sorption of tri-n-butyl phosphate and tris (2-chloroethyl) phosphate on polyethylene and polyvinyl chloride microplastics in seawater. *Mar. Pollut. Bull.* **2019**, *149*, 110490 <https://doi.org/10.1016/j.marpolbul.2019.110490>
34. Wang, J.; Liu, X.; Liu, G., Sorption behaviors of phenanthrene, nitrobenzene, and naphthalene on mesoplastics and microplastics. *Environ. Sci. Pollut. Res. Int.* **2019**, *26*, 12563-12573 <https://doi.org/10.1007/s11356-019-04735-9>
35. Pollio, F. X.; Kunin, R., Sorption of phenols by anion-exchange resin. *Environ. Sci. Technol.* **1967**, *1*, 160-163 <https://doi.org/10.1021/es60002a006>
36. Hai, N.; Liu, X.; Li, Y.; Kong, F.; Fang, S., Effects of Microplastics on the Adsorption and Bioavailability of Three Strobilurin Fungicides. *ACS Omega* **2020**, *5*, 30679-30686 <https://doi.org/10.1021/acsomega.0c04787>
37. Xia, Y.; Zhou, J.-J.; Gong, Y.-Y.; Li, Z.-J.; Zeng, E. Y., Strong influence of surfactants on virgin hydrophobic microplastics adsorbing ionic organic pollutants. *Environ. Pollut.* **2020**, *265*, 115061 <https://doi.org/10.1016/j.envpol.2020.115061>
38. Zhang, Y.; Wang, X.; Lv, F.; Chu, P. K.; Ye, Z.; Zhou, F.; Zhang, R.; Wei, F., Adsorption behavior and mechanism of 2, 4, 6-trinitrotoluene by functionalized polystyrene nanospheres. *J. Appl. Polym. Sci.* **2013**, *128*, 3720-3725 <https://doi.org/10.1002/app.38424>
39. Liu, J.; Ma, Y.; Zhu, D.; Xia, T.; Qi, Y.; Yao, Y.; Guo, X.; Ji, R.; Chen, W., Polystyrene nanoplastics-enhanced contaminant transport: role of irreversible adsorption in glassy polymeric domain. *Environ. Sci. Technol.* **2018**, *52*, 2677-2685 <https://doi.org/10.1021/acs.est.7b05211>
40. Cook Jr, F. C.; Hartz, K. E., Adsorption of chlorinated methanes from aqueous solution on selected plastic adsorbents. *J. - Am. Water Works Assn.* **1983**, *75*, 423-426 <https://doi.org/10.1002/j.1551-8833.1983.tb05180.x>
41. Yu, H.; Yang, B.; Waigi, M. G.; Peng, F.; Hu, X., The effects of functional groups on the sorption of naphthalene on microplastics. *Chemosphere* **2020**, *261*, 127592 <https://doi.org/10.1016/j.chemosphere.2020.127592>
42. Li, H.; Xiong, J.; Xiao, T.; Long, J.; Wang, Q.; Li, K.; Liu, X.; Zhang, G.; Zhang, H., Biochar derived from watermelon rinds as regenerable adsorbent for efficient removal of thallium(I) from wastewater. *Process Saf. Environ. Prot.* **2019**, *127*, 257-266 <https://doi.org/10.1016/j.psep.2019.04.031>
43. Hüffer, T.; Hofmann, T., Sorption of non-polar organic compounds by micro-sized plastic particles in aqueous solution. *Environ. Pollut.* **2016**, *214*, 194-201 <https://doi.org/10.1016/j.envpol.2016.04.018>
44. Müller, A.; Becker, R.; Dorgerloh, U.; Simon, F.-G.; Braun, U., The effect of polymer aging on the uptake of fuel aromatics and ethers by microplastics. *Environ. Pollut.* **2018**, *240*, 639-646 <https://doi.org/10.1016/j.envpol.2018.04.127>
45. Uber, T. H.; Hüffer, T.; Planitz, S.; Schmidt, T. C., Sorption of non-ionic organic compounds by polystyrene in water. *Sci. Total Environ.* **2019**, *682*, 348-355 <https://doi.org/10.1016/j.scitotenv.2019.05.040>
46. Das, S.; Chakraborty, P.; Ghosh, R.; Paul, S.; Mondal, S.; Panja, A.; Nandi, A. K., Folic acid-polyaniline hybrid hydrogel for adsorption/reduction of chromium(VI) and selective adsorption of anionic dye from water. *ACS Sustain. Chem. Eng.* **2017**, *5*, 9325-9337 <https://doi.org/10.1021/acssuschemeng.7b02342>
47. He, Z.; Song, H.; Cui, Y.; Zhu, W.; Du, K.; Yao, S., Porous spherical cellulose carrier modified with polyethyleneimine and its adsorption for Cr (III) and Fe(III) from aqueous solutions. *Chin. J. Chem. Eng.* **2014**, *22*, 984-990 <https://doi.org/10.1016/j.cjche.2014.07.001>
48. Delacour, M. L.; Gailliez, E.; Bacquet, M.; Morcellet, M., Poly (ethylenimine) coated onto silica gels: adsorption capacity toward lead and mercury. *J. Appl. Polym. Sci.* **1999**, *73*, 899-906 [https://doi.org/10.1002/\(SICI\)1097-4628\(19990808\)73:6<899::AID-APP6>3.0.CO;2-O](https://doi.org/10.1002/(SICI)1097-4628(19990808)73:6<899::AID-APP6>3.0.CO;2-O)
49. Bahramzadeh, A.; Zahedi, P.; Abdouss, M., Acrylamide-plasma treated electrospun polystyrene nanofibrous adsorbents for cadmium and nickel ions removal from aqueous solutions. *J. Appl. Polym. Sci.* **2016**, *133*, <https://doi.org/10.1002/app.42944>

50. Xiong, C.; Yao, C., Preparation and application of acrylic acid grafted polytetrafluoroethylene fiber as a weak acid cation exchanger for adsorption of Er(III). *J. Hazard. Mater.* **2009**, *170*, 1125-1132 <https://doi.org/10.1016/j.jhazmat.2009.05.089>
51. Li, L.; Liu, F.; Jing, X.; Ling, P.; Li, A., Displacement mechanism of binary competitive adsorption for aqueous divalent metal ions onto a novel IDA-chelating resin: isotherm and kinetic modeling. *Water Res.* **2011**, *45*, 1177-1188 <https://doi.org/10.1016/j.watres.2010.11.009>
52. Rengaraj, S.; Yeon, K.-H.; Kang, S.-Y.; Lee, J.-U.; Kim, K.-W.; Moon, S.-H., Studies on adsorptive removal of Co(II), Cr(III) and Ni(II) by IRN77 cation-exchange resin. *J. Hazard. Mater.* **2002**, *92*, 185-198 [https://doi.org/10.1016/S0304-3894\(02\)00018-3](https://doi.org/10.1016/S0304-3894(02)00018-3)
53. Atia, A. A.; Donia, A. M.; Yousif, A. M., Synthesis of amine and thio chelating resins and study of their interaction with zinc(II), cadmium(II) and mercury(II) ions in their aqueous solutions. *React. Funct. Polym.* **2003**, *56*, 75-82 [https://doi.org/10.1016/S1381-5148\(03\)00046-4](https://doi.org/10.1016/S1381-5148(03)00046-4)
54. Xu, Y.; Zeng, X.; Zhang, B.; Zhu, X.; Zhou, M.; Zou, R.; Sun, P.; Luo, G.; Yao, H., Experiment and kinetic study of elemental mercury adsorption over a novel chlorinated sorbent derived from coal and waste polyvinyl chloride. *Energy Fuels* **2016**, *30*, 10635-10642 <https://doi.org/10.1021/acs.energyfuels.6b01372>
55. Xiao, H.; He, B.; Qian, L.; Li, J., Cationic polystyrene spheres for removal of anionic contaminants in white water of papermaking. *J. Appl. Polym. Sci.* **2015**, *132* <https://doi.org/10.1002/app.41379>
56. Sun, C.; Qu, R.; Ji, C.; Wang, C.; Sun, Y.; Yue, Z.; Cheng, G., Preparation and adsorption properties of crosslinked polystyrene-supported low-generation diethanolamine-typed dendrimer for metal ions. *Talanta* **2006**, *70*, 14-19 <https://doi.org/10.1016/j.talanta.2006.01.011>
57. Li, J.-h.; Miao, X.-x.; Chen, X.-y.; Lu, L.; Yang, Y.; Fu, Y.-q.; Xiong, C.-h., Application and characterization of grafted polytetrafluoroethylene fiber for enhanced adsorption of Cu(II) in aqueous solutions. *J. Cent. South Univ.* **2016**, *23*, 2513-2519 <https://doi.org/10.1007/s11771-016-3311-x>
58. Navarro, R. R.; Sumi, K.; Fujii, N.; Matsumura, M., Mercury removal from wastewater using porous cellulose carrier modified with polyethyleneimine. *Water Res.* **1996**, *30*, 2488-2494 [https://doi.org/10.1016/0043-1354\(96\)00143-1](https://doi.org/10.1016/0043-1354(96)00143-1)
59. Kang, S. Y.; Lee, J. U.; Moon, S. H.; Kim, K. W., Competitive adsorption characteristics of Co<sup>2+</sup>, Ni<sup>2+</sup>, and Cr<sup>3+</sup> by IRN-77 cation exchange resin in synthesized wastewater. *Chemosphere* **2004**, *56*, 141-147 <https://doi.org/10.1016/j.chemosphere.2004.02.004>
60. Ji, C.; Song, S.; Wang, C.; Sun, C.; Qu, R.; Wang, C.; Chen, H., Preparation and adsorption properties of chelating resins containing 3-aminopyridine and hydrophilic spacer arm for Hg(II). *Chem. Eng. J.* **2010**, *165*, 573-580 <https://doi.org/10.1016/j.cej.2010.09.075>
61. Ho, W.-K.; Leung, K. S.-Y., The crucial role of heavy metals on the interaction of engineered nanoparticles with polystyrene microplastics. *Water Res.* **2021**, *201*, 117317 <https://doi.org/10.1016/j.watres.2021.117317>
62. Park, S. W.; Bediako, J. K.; Song, M.-H.; Choi, J.-W.; Lee, H.-C.; Yun, Y.-S., Facile fabrication of polyacrylic acid-polyvinyl chloride composite adsorbents for the treatment of cadmium-contaminated wastewater. *J. Environ. Eng.* **2018**, *6*, 2401-2408 <https://doi.org/10.1016/j.jece.2018.03.038>
63. Lang, M.; Yu, X.; Liu, J.; Xia, T.; Wang, T.; Jia, H.; Guo, X., Fenton aging significantly affects the heavy metal adsorption capacity of polystyrene microplastics. *Sci. Total Environ.* **2020**, *722*, 137762 <https://doi.org/10.1016/j.scitotenv.2020.137762>
64. Chen, C.; Chen, L.; Yao, Y.; Artigas, F.; Huang, Q.; Zhang, W., Organotin release from polyvinyl chloride microplastics and concurrent photodegradation in water: Impacts from salinity, dissolved organic matter, and light exposure. *Environ. Sci. Technol.* **2019**, *53*, 10741-10752 <https://doi.org/10.1021/acs.est.9b03428>
65. Mahanta, D.; Madras, G.; Radhakrishnan, S.; Patil, S., Adsorption and desorption kinetics of anionic dyes on doped polyaniline. *J. Phys. Chem. B* **2009**, *113*, 2293-2299 <https://doi.org/10.1021/jp809796e>
66. Nath, K.; Maity, K.; Biradha, K., Two-dimensional coordination polymers with "X"-Shaped cavities as adsorbents of oxoanion pollutants and toxic dyes. *Cryst. Growth Des.* **2017**, *17*, 4437-4444 <https://doi.org/10.1021/acs.cgd.7b00771>
67. Qu, R.; Wang, C.; Ji, C.; Sun, C.; Sun, X.; Cheng, G., Preparation, characterization, and metal binding behavior of novel chelating resins containing sulfur and polyamine. *J. Appl. Polym. Sci.* **2005**, *95*, 1558-1565 <https://doi.org/10.1002/app.21370>
68. Deng, S.; Bai, R.; Chen, J. P., Aminated polyacrylonitrile fibers for lead and copper removal. *Langmuir* **2003**, *19*, 5058-5064 <https://doi.org/10.1021/la034061x>
69. Dong, Y.; Gao, M.; Qiu, W.; Song, Z., Adsorption of arsenite to polystyrene microplastics in the presence of humus. *Environmental Science: Processes & Impacts* **2020**, *22*, 2388-2397 <https://doi.org/10.1039/D0EM00324G>

70. Yu, C.; Lin, W.; Jiang, J.; Jing, Z.; Hong, P.; Li, Y., Preparation of a porous superhydrophobic foam from waste plastic and its application for oil spill cleanup. *RSC Adv.* **2019**, *9*, 37759-37767 <https://doi.org/10.1039/C9RA06848A>
71. Gong, J.; Liu, J.; Chen, X.; Jiang, Z.; Wen, X.; Mijowska, E.; Tang, T., Striking influence of NiO catalyst diameter on the carbonization of polypropylene into carbon nanomaterials and their high performance in the adsorption of oils. *RSC Adv.* **2014**, *4*, 33806-33814 <https://doi.org/10.1039/C4RA05016A>
72. Hinrichs, R.; Snoeyink, V., Sorption of benzenesulfonates by weak base anion exchange resins. *Water Res.* **1976**, *10*, 79-87 [https://doi.org/10.1016/0043-1354\(76\)90161-5](https://doi.org/10.1016/0043-1354(76)90161-5)
73. Lhoest, J. B.; Detrait, E.; Van Den Bosch De Aguilar, P.; Bertrand, P., Fibronectin adsorption, conformation, and orientation on polystyrene substrates studied by radiolabeling, XPS, and ToF SIMS. *J. Biomed. Mater. Res.* **1998**, *41*, 95-103 [https://doi.org/10.1002/\(SICI\)1097-4636\(199807\)41:1<95::AID-JBM12>3.0.CO;2-G](https://doi.org/10.1002/(SICI)1097-4636(199807)41:1<95::AID-JBM12>3.0.CO;2-G)
74. Boisson, C.; Jozefonvicz, J.; Brash, J. L., Adsorption of thrombin from buffer and modified plasma to polystyrene resins containing sulphonate and sulphamide arginyl methyl ester groups. *Biomaterials* **1988**, *9*, 47-52 [https://doi.org/10.1016/0142-9612\(88\)90068-3](https://doi.org/10.1016/0142-9612(88)90068-3)
75. Qian, D.; Bai, L.; Wang, Y.-S.; Song, F.; Wang, X.-L.; Wang, Y.-Z., A bifunctional alginate-based composite hydrogel with synergistic pollutant adsorption and photocatalytic degradation performance. *Ind. Eng. Chem. Res.* **2019**, *58*, 13133-13144 <https://doi.org/10.1021/acs.iecr.9b01709>
76. Chao, Y.; Zhu, W.; Ye, Z.; Wu, P.; Wei, N.; Wu, X.; Li, H., Preparation of metal ions impregnated polystyrene resins for adsorption of antibiotics contaminants in aquatic environment. *J. Appl. Polym. Sci.* **2015**, *132* <https://doi.org/10.1002/app.41803>
77. Zhu, H.; Qiu, S.; Jiang, W.; Wu, D.; Zhang, C., Evaluation of electrospun polyvinyl chloride/polystyrene fibers as sorbent materials for oil spill cleanup. *Environ. Sci. Technol.* **2011**, *45*, 4527-4531 <https://doi.org/10.1021/es2002343>
78. Guo, N. N.; Zhang, Q. G.; Li, H. M.; Wu, X. M.; Liu, Q. L.; Zhu, A. M., Facile fabrication, structure, and applications of polyvinyl chloride mesoporous membranes. *Ind. Eng. Chem. Res.* **2014**, *53*, 20068-20073 <https://doi.org/10.1002/jctb.2089>
79. Liu, P.; Lu, K.; Li, J.; Wu, X.; Qian, L.; Wang, M.; Gao, S., Effect of aging on adsorption behavior of polystyrene microplastics for pharmaceuticals: Adsorption mechanism and role of aging intermediates. *J. Hazard. Mater.* **2020**, *384*, 121193 <https://doi.org/10.1016/j.jhazmat.2019.121193>
80. Zhang, B.; Yu, S.; Zhu, Y.; Shen, Y.; Gao, X.; Shi, W.; Tay, J. H., Adsorption mechanisms of crude oil onto polytetrafluoroethylene membrane: Kinetics and isotherm, and strategies for adsorption fouling control. *Sep. Purif. Technol.* **2020**, *235*, 116212 <https://doi.org/10.1016/j.seppur.2019.116212>
81. Soetaredjo, F. E.; Ismadji, S.; Foe, K.; Woworuntu, G. L., Removal of Hazardous contaminants from water or wastewater using polymer nanocomposites Materials. *Nanotechnology for Sustainable Water Resources*: **2018**, *2*, 103-139 <https://doi.org/10.1002/9781119323655.ch4>
82. Yang, L.; Zhang, H.; Tan, T.; Rahman, A. U., Thermodynamic and NMR investigations on the adsorption mechanism of puerarin with oligo- $\beta$ -cyclodextrin-coupled polystyrene-based matrix. *J. Chem. Technol. Biotechnol.* **2009**, *84*, 611-617 <https://doi.org/10.1002/jctb.2089>
